# Supplementary material for: NorCPM1 and its contribution to CMIP6 DCPP
Source: Copernicus journal article supplement (doi:10.5194/gmd-2021-91), 2021-05-12
Supplement: Supplementary file [file gmd-2021-91-AC2-supplement.pdf]

Reply to RC3 – Supplement

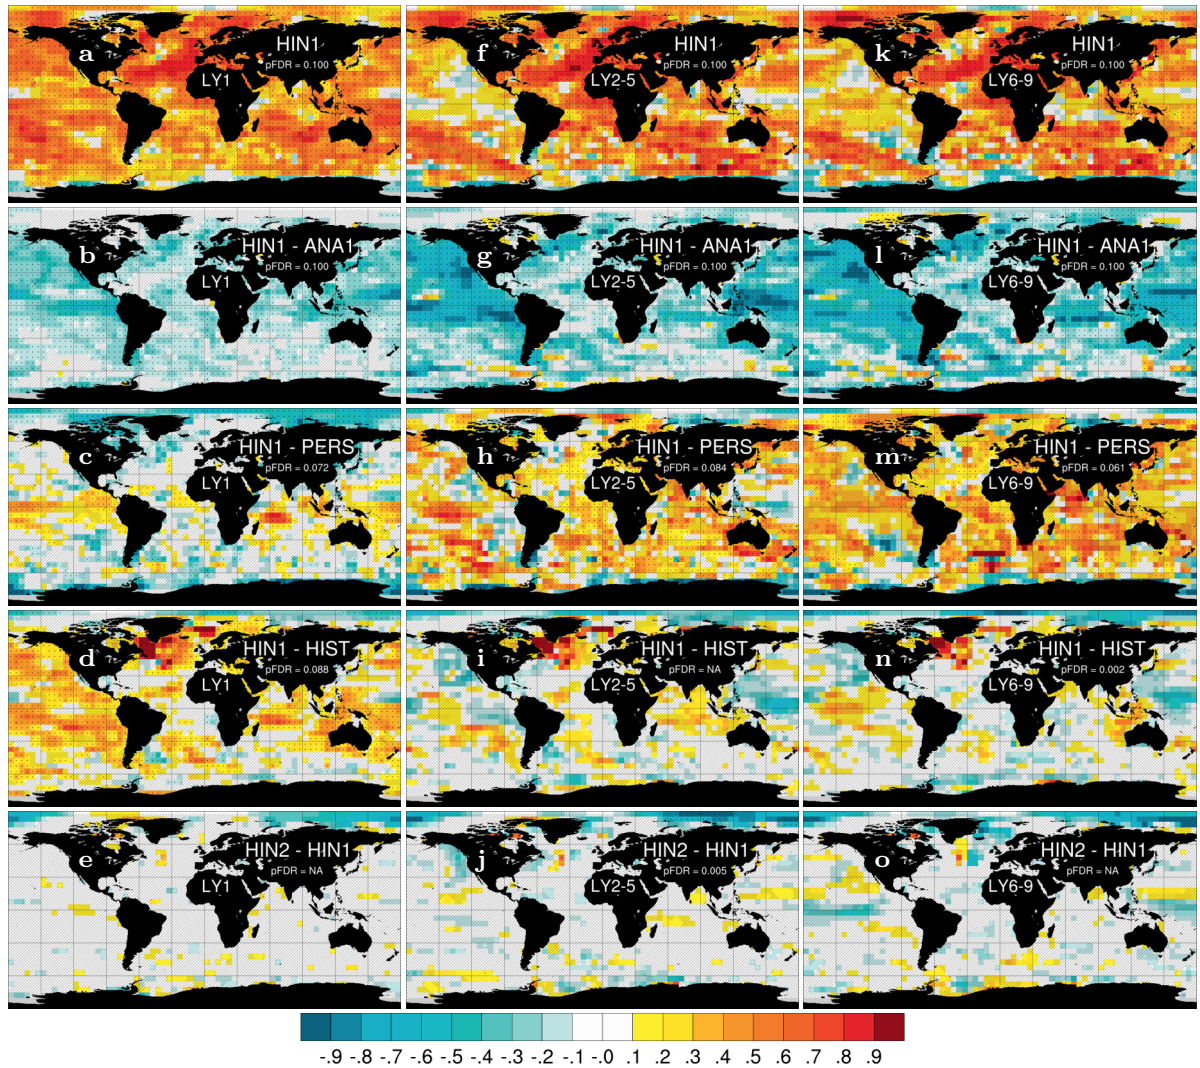

Figure D3: Original version showing ACC for 0-300 m ocean temperature.



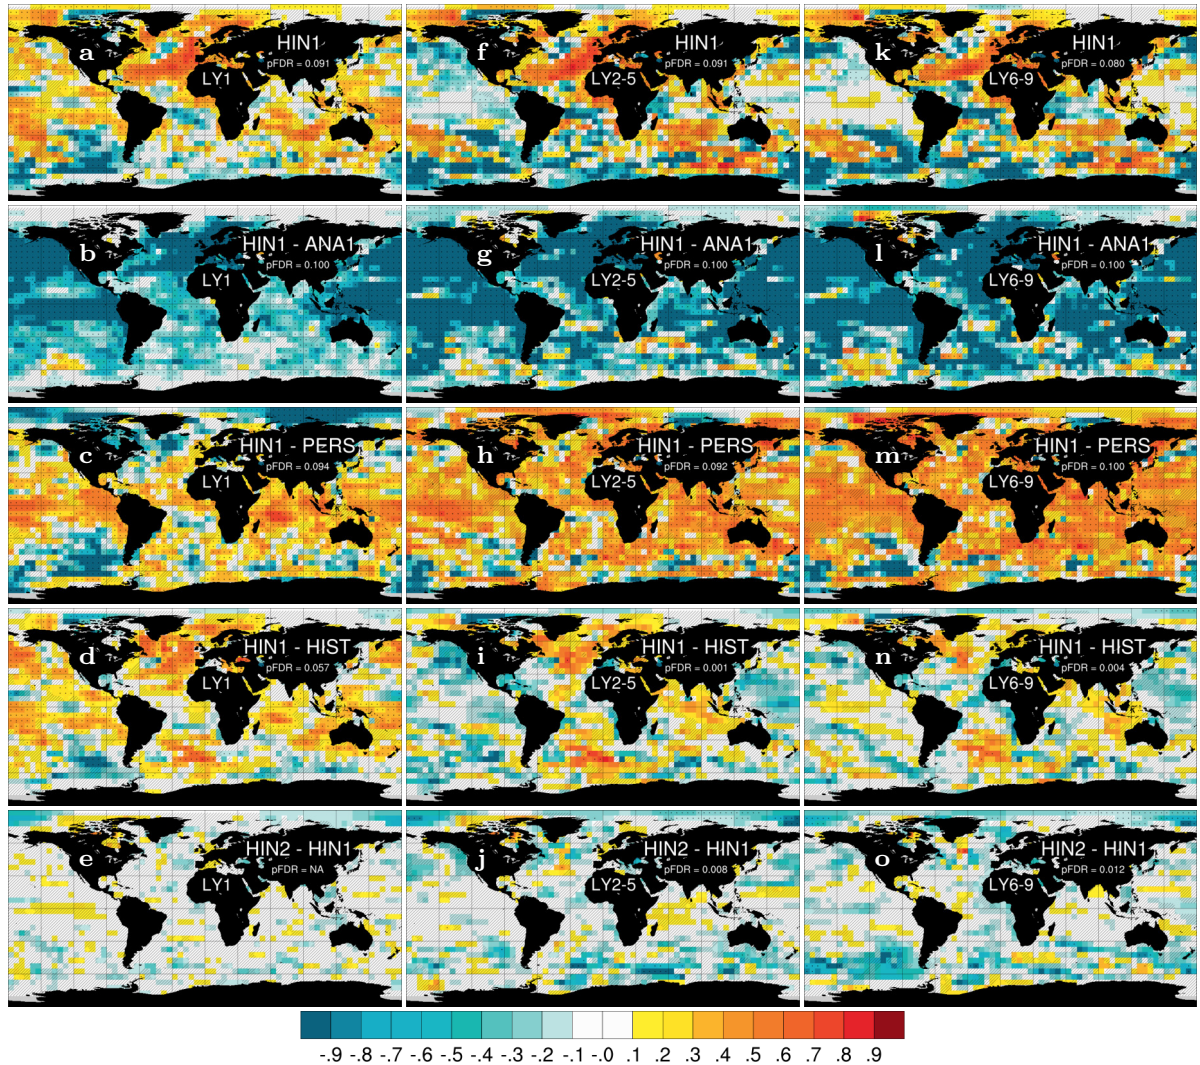

Figure D3: Alternative version showing MSSS for 0-300 m ocean temperature. The MSSS calculation follows Yeager et al. (2018).
